# Supplementary material for: Reliable and Sensitive Nested PCR for the Detection of Chlamydia in Sputum
Source: MDPI journal article supplement (doi:10.3390/microorganisms9050935), 2021-04-27
Supplement: s1 [file s1]

# Alignment statistics for match #1

| Score         | Expect                                                        | Identities     | Gaps         | Strand     |
|---------------|---------------------------------------------------------------|----------------|--------------|------------|
| 441 bits(488) | 2e-122                                                        | 819/1190 (69%) | 28/1190 (2%) | Plus/Minus |
| Query 1       | ATGAAAAAACTCTTAAAGTCGGCGTTATTATCCGCCGCATTTGCTGGTTCTGTCGGCTCC  | 60             |              |            |
|               |                                                               |                |              |            |
| Sbjct 785542  | ATGAAAAAACTCTTGAAATCGGTATTAGTATTTGCCGC-TTTGA--GTTCTGCTTCCTCC  | 785486         |              |            |
| Query 61      | TTACAAGCCTTGCTGTAGGGAACCTTCTGATCCAAGCTTATTAATTGATGGTACAATA    | 120            |              |            |
|               |                                                               |                |              |            |
| Sbjct 785485  | TTGCAAGCTCTGCCTGTGGGGAATCCTGCTGAACCAAGCCTTATGATCGACGGAATTCTG  | 785426         |              |            |
| Query 121     | TGGGAAGGTGCTGCAGGAGATCCTTGCGATCCTTGCGCTACTTGGTGCGACGCTATTAGC  | 180            |              |            |
|               |                                                               |                |              |            |
| Sbjct 785425  | TGGGAAGGTTTCGGCGGAGATCCTTGCGATCCTTGCACTTGGTGTGACGCTATCAGC     | 785366         |              |            |
| Query 181     | TTACGTGCTGGATTTTACGGAGACTATGTTTTCGACCGTATCTTAAAAGTAGATGCACCT  | 240            |              |            |
|               |                                                               |                |              |            |
| Sbjct 785365  | ATGCGTATGGGTTACTATGGTGACTTTGTTTTCGACCGTGTGTTTGAACAGATGTGAAT   | 785306         |              |            |
| Query 241     | AAAACATTTTCTATGGGAGCCAAGCCTACTGGATCCGC-----TGCTGCAAACTATACT   | 294            |              |            |
|               |                                                               |                |              |            |
| Sbjct 785305  | AAAGAATTCCAAATGGGTGACAAGCCTACAAGTACTACAGGCAATGCTACAGCTCCAACC  | 785246         |              |            |
| Query 295     | ACTGCCGTAGATAGACCTAACCCGGCCTACAATAAGCATTTACACGATGCAGAGTGGTTC  | 354            |              |            |
|               |                                                               |                |              |            |
| Sbjct 785245  | ACTCTTACAGCAAGAGAGAATCCTGCTTACGGCCGACATATGCAGGATGCTGAGATGTTT  | 785186         |              |            |
| Query 355     | ACTAATGCAGGCTTCATTGCCTTAAACATTTGGGATCGCTTTGATGTTTTCTGTACTTTA  | 414            |              |            |
|               |                                                               |                |              |            |
| Sbjct 785185  | ACAAATGCCGCTTGCATGGCATTGAATATTGGGATCGCTTTGATGTATTCTGTACACTA   | 785126         |              |            |
| Query 415     | GGAGCTTCTAATGGTTACATTAGAGGAACTCTACAGCGTTCAATCTCGTTGGTTTATTC   | 474            |              |            |
|               |                                                               |                |              |            |
| Sbjct 785125  | GGAGCCTCTAGCGGATACCTTAAAGGAACTCTGCTTCTTTCAATTTAGTTGGATTGTTT   | 785066         |              |            |
| Query 475     | GGAGTTAAAGGTACT-----ACTGTAAATGCAAATGAACTACCAAACGTTTCTTTAAGT   | 528            |              |            |
|               |                                                               |                |              |            |
| Sbjct 785065  | GGAGATAATGAAATCAAAGCACGGTCAAAACGAATTCTGTACCAAATATGAGCTTAGAT   | 785006         |              |            |
| Query 529     | AACGGAGTTGTTGAACTTTACACAGACACCTCTTCTCTTGGAGCGTAGGCGCTCGTGGA   | 588            |              |            |
|               |                                                               |                |              |            |
| Sbjct 785005  | CAATCTGTTGTTGAACTTTACACAGATACTGCCTTCTCTTGGAGCGTGGGCGCTCGAGCA  | 784946         |              |            |
| Query 589     | GCCTTATGGGAATGCGGTTGTGCAACTTTGGGAGCTGAATTCCAATATGCACAGTCCAAA  | 648            |              |            |
|               |                                                               |                |              |            |
| Sbjct 784945  | GCCTTGTGGGAGTGCGGATGTGCGACTTTAGGGGCTTCTTTCCAATACGCTCAATCTAAA  | 784886         |              |            |
| Query 649     | CCTAAAGTTGAAGAACTTAATGTGATCTGTAACGTATCGCAATTCTCTGTAAACAAACCC  | 708            |              |            |
|               |                                                               |                |              |            |
| Sbjct 784885  | CCTAAAGTCGAAGAATTAAACGTTCTCTGTAACGCAGCTGAGTTTACTATCAATAAGCCT  | 784826         |              |            |
| Query 709     | AAGGGCTATAAAGGCGTTGCTTTCCC-CTTGCCAACAGACGCTGGCGTAGCAACAGCTAC  | 767            |              |            |
|               |                                                               |                |              |            |
| Sbjct 784825  | AAAGGATATGTAGGGCAAGAATTCCCTCTTGCACTCATA-GCAGGAACTGATGCAGCGAC  | 784767         |              |            |
| Query 768     | TGGAACAAAGTCTGCGACCATCAATTATCATGAATGGCAAGTAGGAGCCTCTCTATCTTA  | 827            |              |            |
|               |                                                               |                |              |            |
| Sbjct 784766  | GGGCACTAAAGATGCCTCTATTGATTACCATGAGTGGCAAGCAAGTTTAGCTCTCTCTTA  | 784707         |              |            |
| Query 828     | CAGACT-AAACTCTTTAGTGCCATACATTGGAGTACAATGGTCTCGAGCAACTTTTGATG  | 886            |              |            |
|               |                                                               |                |              |            |
| Sbjct 784706  | CAGATTGAATATGTTCACT-CCCTACATTGGAGTTAAATGGTCTCGAGCAAGTTTGATG   | 784648         |              |            |
| Query 887     | CTGATAACATCCGCATTGCTCAGCCAAAACCTACAGC--TGTTTTAACTTAACTGC      | 944            |              |            |
|               |                                                               |                |              |            |
| Sbjct 784647  | CCGATACGATTTCGTATAGCCAGCCAAAATCAGCTACAGCTATCTTTGATACT--ACCAC  | 784590         |              |            |
| Query 945     | ATGGAACCCCTTCT-TTACTAGGAAATGCCACAGCATTGTCTACTACTGA--TTCGTTCT  | 1000           |              |            |
|               |                                                               |                |              |            |
| Sbjct 784589  | GCTTAACCCAACTATTGCT-GGAGCTGGCGATGTGAAAGCTAGCGCAGAGGGTCAGCTCG  | 784531         |              |            |
| Query 1001    | CAGACTTCATGCAAAATTGTTTCCTGTGATCAACAAGTTTAAATCTAGAAAAGCTTGTG   | 1060           |              |            |
|               |                                                               |                |              |            |
| Sbjct 784530  | GAGATACCATGCAAAATCGTCTCCTTGCAATTGAACAAGATGAAATCTAGAAAATCTTGCG | 784471         |              |            |



|                      |                                                                 |
|----------------------|-----------------------------------------------------------------|
| <i>C.abortus</i>     | AATTCGATGCAACGCGAAGAACCTTACCTGGGCTTGACATGTATTTGACCGCGGCAGAAA    |
| <i>C.psittaci</i>    | AATTCGATGCAACGCGAAGAACCTTACCTGGGCTTGACATGTATTTGACCGCGGCAGAAA    |
| <i>C.pneumoniae</i>  | AATTCGATGCAACGCGAAGGACCTTACCTGGACTTGACATGTATTTGACAACTGTAGAAA    |
| <i>C.trachomatis</i> | AATTCGATGCAACGCGAAGGACCTTACCTGGGTTTGACATGTATATGACCGCGGCAGAAA    |
| <i>E.coli</i>        | AATTCGATGCAACGCGAAGAACCTTACCTGGTCTTGACATCCACGGAAGT-TTTCAGAGA    |
| <i>Shigella</i>      | AATTCGATGCAACGCGAAGAACCTTACCTGGTCTTGACATCCACAGAACC-TTGTAGAGA    |
| <i>Yersinia</i>      | AATTCGATGCAACGCGAAGAACCTTACCTGGTCTTGACATCCACAGAACC-TTCCAGAGA    |
| <i>Salmonella</i>    | AATTCGATGCAACGCGAAGAACCTTACCTGGTCTTGACATCCAGAGAACC-TGGCAGAGA    |
| <i>C.jejuni</i>      | AATTCGAAGATACGCGAAGAACCTTACCTGGGCTTGATATCCTAAGAACC-TTATAGAGA    |
|                      | ***** * ***** ***** ** * ** *                                   |
|                      |                                                                 |
| <i>C.abortus</i>     | TGTC--GTTTTT---CGCAAGGACAGATACACAGGTGCTGTCATGGCTGTCGTCAGCTCG    |
| <i>C.psittaci</i>    | TGTC--GTTTTT---CGCAAGGACAGATACACAGGTGCTGTCATGGCTGTCGTCAGCTCG    |
| <i>C.pneumoniae</i>  | TACA--GCTTTC---CGCAAGGACAGATACACAGGTGCTGTCATGGCTGTCGTCAGCTCG    |
| <i>C.trachomatis</i> | TGTC--GTTTTT---CACAAGGCATATACACAGGTGCTGTCATGGCTGTCGTCAGCTCG     |
| <i>E.coli</i>        | TGAGAATGTGCC---TTCGGGAACCGTGAGACAGGTGCTGTCATGGCTGTCGTCAGCTCG    |
| <i>Shigella</i>      | TACGAGGGTGCC---TTCGGGAACCTGTGAGACAGGTGCTGTCATGGCTGTCGTCAGCTCG   |
| <i>Yersinia</i>      | TGGATTGGTGCC---TTCGGGAACCTGTGAGACAGGTGCTGTCATGGCTGTCGTCAGCTCG   |
| <i>Salmonella</i>    | TGCCGGGGTGCC---TTCGGGAACCTGTGAGACAGGTGCTGTCATGGCTGTCGTCAGCTCG   |
| <i>C.jejuni</i>      | TATGAGGGTGCTAGCTTGCTAGAACCTTAGAGACAGGTGCTGCACGGCTGTCGTCAGCTCG   |
|                      | * * * * *                                                       |
|                      |                                                                 |
| <i>C.abortus</i>     | TGCCGTGAGGTGTTGGGTTAAGTCCCGCAACGAGCGCAACCCTTATCGTTAGTTGCCAAC    |
| <i>C.psittaci</i>    | TGCCGTGAGGTGTTGGGTTAAGTCCCGCAACGAGCGCAACCCTTATCGTTAGTTGCCAAC    |
| <i>C.pneumoniae</i>  | TGCCGTGAGGTGTTGGGTTAAGTCCCGCAACGAGCGCAACCCTTATCGTTAGTTGCCAGC    |
| <i>C.trachomatis</i> | TGCCGTGAGGTGTTGGGTTAAGTCCCGCAACGAGCGCAACCCTTATCGTTAGTTGCCAGC    |
| <i>E.coli</i>        | TGTTGTGAAATGTTGGGTTAAGTCCCGCAACGAGCGCAACCCTTATCCTTTGTTGCCAGC    |
| <i>Shigella</i>      | TGTTGTGAAATGTTGGGTTAAGTCCCGCAACGAGCGCAACCCTTATCCTTTGTTGCCAGC    |
| <i>Yersinia</i>      | TGTTGTGAAATGTTGGGTTAAGTCCCGCAACGAGCGCAACCCTTATCCTTTGTTGCCAGC    |
| <i>Salmonella</i>    | TGTTGTGAAATGTTGGGTTAAGTCCCGCAACGAGCGCAACCCTTATCCTTTGTTGCCAGC    |
| <i>C.jejuni</i>      | TGTCGTGAGATGTTGGGTTAAGTCCCGCAACGAGCGCAACCACGTATTTAGTTGCTAAC     |
|                      | ** **** ***** * ** ***** *                                      |
|                      |                                                                 |
| <i>C.abortus</i>     | ACTTAGGGTGGGAACCTCTAACGAGACTGCCTGGGTAAACCAGGAGGAAGGCGAGGATGAC   |
| <i>C.psittaci</i>    | ACTTAGGGTGGGAACCTCTAACGAGACTGCCTGGGTAAACCAGGAGGAAGGCGAGGATGAC   |
| <i>C.pneumoniae</i>  | ACTTAGGGTGGGAACCTCTAACGAGACTGCCTGGGTAAACCAGGAGGAAGGCGAGGATGAC   |
| <i>C.trachomatis</i> | ACTTAGGGTGGGAACCTCTAACGAGACTGCCTGGGTAAACCAGGAGGAAGGCGAGGATGAC   |
| <i>E.coli</i>        | GGTCCGGCCGGGAACCTCAAAGGAGACTGCCAGTGATAAACTGGAGGAAGGTGGGGATGAC   |
| <i>Shigella</i>      | GGTCCGGCCGGGAACCTCAAAGGAGACTGCCAGTGATAAACTGGAGGAAGGTGGGGATGAC   |
| <i>Yersinia</i>      | GGTCCGGCCGGGAACCTCAAAGGAGACTGCCAGTGATAAACTGGAGGAAGGTGGGGATGAC   |
| <i>Salmonella</i>    | GGTTCGGCCGGGAACCTCAAAGGAGACTGCCGGTGATAAACCGGAGGAAGGTGGGGATGAC   |
| <i>C.jejuni</i>      | GGTTCGGCCGAGCACTCTAAATAGACTGCCTTCG-TAAGGAGGAGGAAGGTGTGGACGAC    |
|                      | * ** * * * * * * * * * * * * * * * * *                          |
|                      |                                                                 |
| <i>C.abortus</i>     | GTCAAGTCAGCATGGCCCTTATGCCCAGGGCTACACACGTGCTACAATGGCCAGTACAGA    |
| <i>C.psittaci</i>    | GTCAAGTCAGCATGGCCCTTATGCCCAGGGCTACACACGTGCTACAATGGCCAGTACAGA    |
| <i>C.pneumoniae</i>  | GTCAAGTCAGCATGGCCCTTATGTCCAGGGCGACACACGTGCTACAATGGTTAGTACAGA    |
| <i>C.trachomatis</i> | GTCAAGTCAGCATGGCCCTTATGCCCAGGGCGACACACGTGCTACAATGGCCAGTACAGA    |
| <i>E.coli</i>        | GTCAAGTCATCATGGCCCTTACGACCAGGGCTACACACGTGCTACAATGGCGCATACAAA    |
| <i>Shigella</i>      | GTCAAGTCATCATGGCCCTTACGACCAGGGCTACACACGTGCTACAATGGCGCATACAAA    |
| <i>Yersinia</i>      | GTCAAGTCATCATGGCCCTTACGACCAGGGCTACACACGTGCTACAATGGCGCATACAAA    |
| <i>Salmonella</i>    | GTCAAGTCATCATGGCCCTTACGACCAGGGCTACACACGTGCTACAATGGCGCATACAAA    |
| <i>C.jejuni</i>      | GTCAAGTCATCATGGCCCTTATGCCCAGGGCGACACACGTGCTACAATGGCATATACAA     |
|                      | ***** ***** * ***** ***** *****                                 |
|                      |                                                                 |
| <i>C.abortus</i>     | AGGTAGC AATATCGCAAGATGGAGCAAATCT - CAAAGCTGGCCCC AGTTCGGATTGTAG |
| <i>C.psittaci</i>    | AGGTAGC AATATCGTGAGATGGAGCAAATCT - CAAAGCTGGCCCC AGTTCGGATTGTAG |
| <i>C.pneumoniae</i>  | AGGTAGC AAGATCGTGAGATGGAGCAAATCT - AAAAGCTAGCCCC AGTTCGGATTGTAG |
| <i>C.trachomatis</i> | AGGTGGC AAGATCGCGAGATGGAGCAAATCT - CAAAGCTGGCCCC AGTTCGGATTGTAG |
| <i>E.coli</i>        | GAGAAGCGACCTCGCGAGAGCAAGCGGACCTCATAAAGTGCGTCGTAGTCCGGATTGGAG    |
| <i>Shigella</i>      | GAGAAGCGACCTCGCGAGAGCAAGCGGACCTCATAAAGTGCGTCGTAGTCCGGATTGGAG    |
| <i>Yersinia</i>      | GAGAAGCGAACTCGCGAGAGCAAGCGGACCTCATAAAGTGCGTCGTAGTCCGGATTGGAG    |
| <i>Salmonella</i>    | GAGAAGCGACCTCGCGAGAGCAAGCGGACCTCATAAAGTGCGTCGTAGTCCGGATTGGAG    |
| <i>C.jejuni</i>      | GAGACGCAATACCGGAGGTGGAGCAAATCTA-TAAAAATATGTCCAGTTTCGATTGTTT     |
|                      | * ** * * * * * * * * * * * * * * * * *                          |

A.

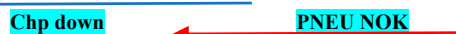

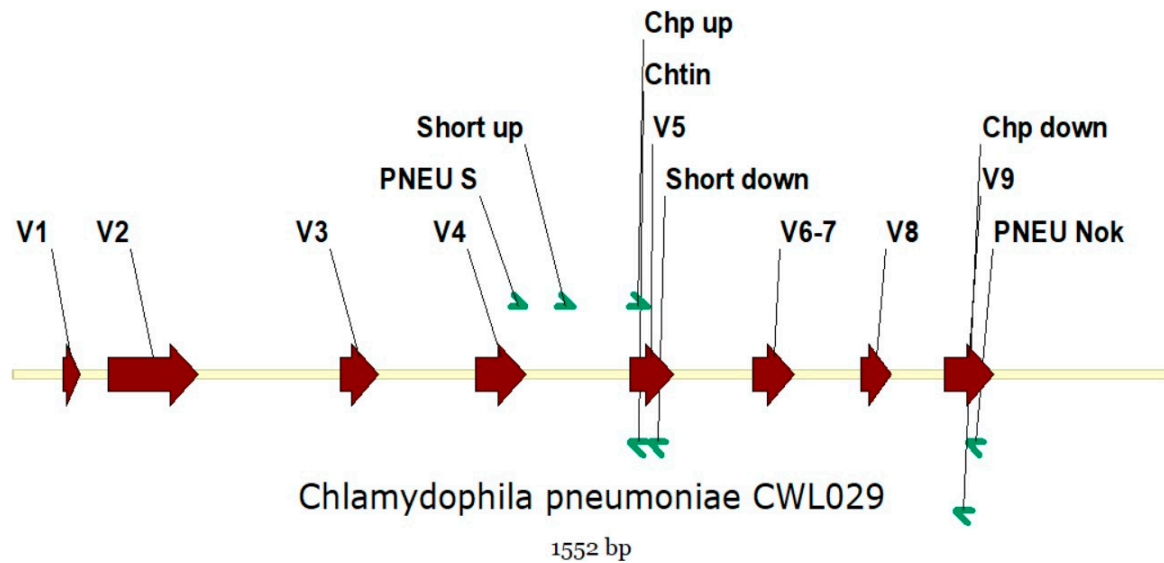

**B.**

**Figure S2** Design of primers specific for four chlamydial species infecting humans. Reference sequences: *Chlamydia abortus* GN6 CP021996.1; *Chlamydia psittaci* 84/55 CP003790; *Chlamydia pneumoniae* TW-183 AE009440.1; *Chlamydia trachomatis* C/TW-3 CP006945.1; *E.coli* ECOUW87; *Shigella dysenteriae* CP061527.1; *Yersinia sp.* EU555393; *Salmonella enterica* CP045958.1; *Campylobacter jejuni* ATCC 35925 CP020045.1. **A.** Outer primers are in red letters and yellow shadowed; Inner primers are marked in blue; degenerate positions are grey shadowed. **B.** Location of the primers on the 16S rRNA gene. PNEU S pos. 676-686; PNEU Nok pos. 1280-1301; Chp up pos. 826-850; Chp down pos. 1264-1286; Short down pos. 854-874; Short up pos. 729-750; Chtinok pos. 826-850.

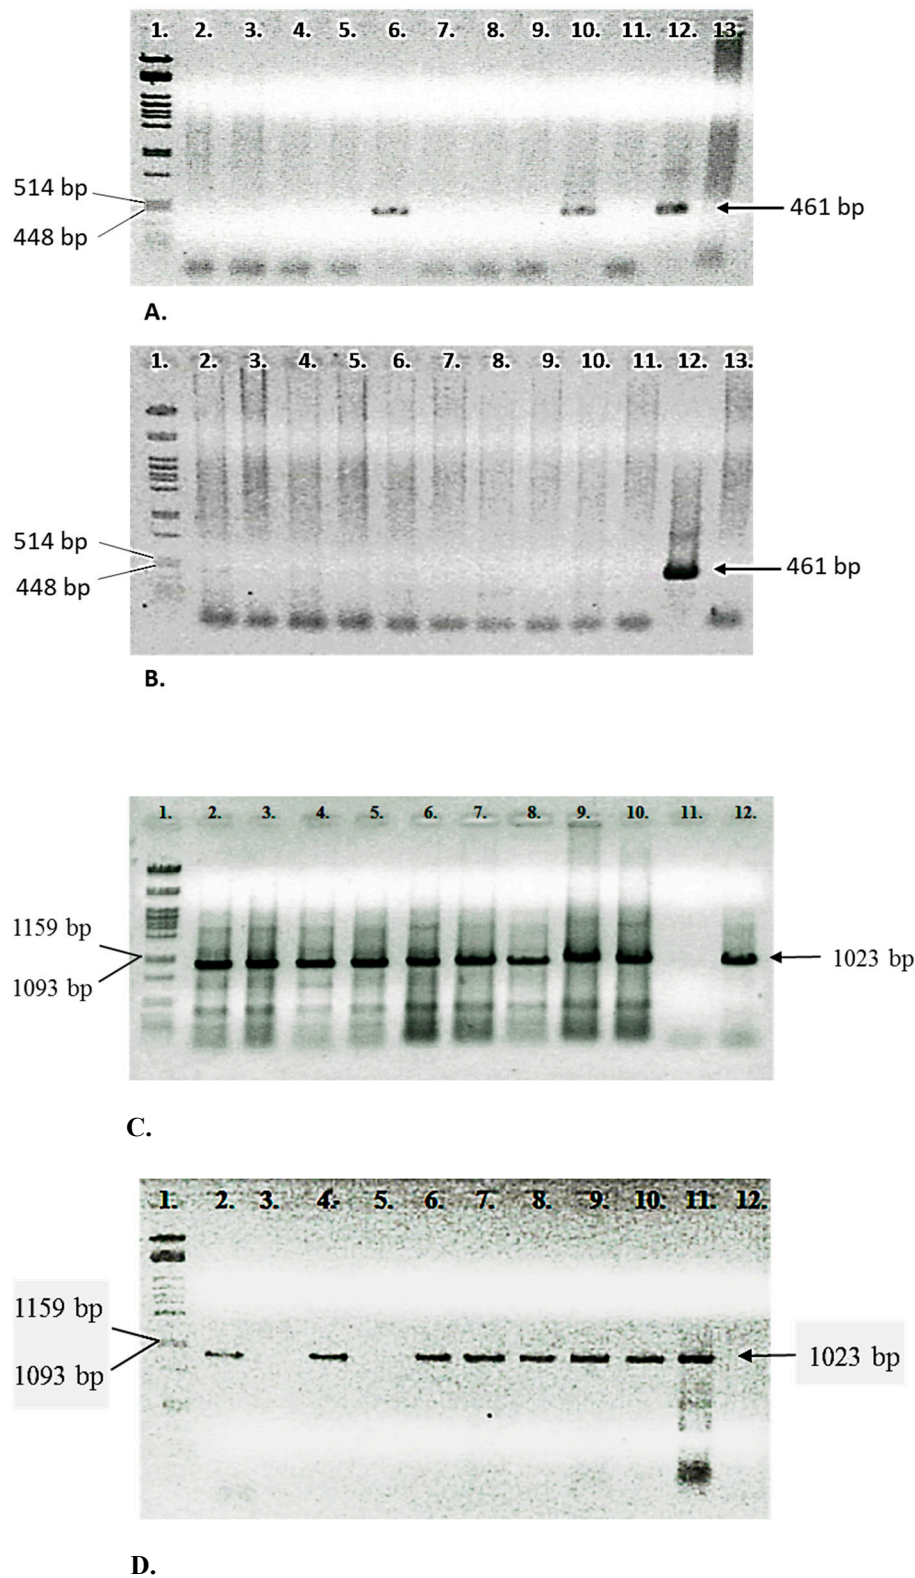

**Figure S3** Amplification and DNA degradation during 1 year of storage at -20°C. Lanes: 1.  $\lambda$ /*Pst*I size marker, 2. 3SP, 3. NC, 4. 4SP, 5. NC, 6. 5SP, 7. NC, 8. 6SP, 9. NC, 10. 33SP, 11/12 positive and negative control (NC). **A. B.** Chp up/Chp down primers. Size of PCR product is 461 bp. **A.** Fresh DNA preps. **B.** After 1 year of storage at -20°C. **C. D.** MT for/MT rev primers. Size of PCR product is 1023 bp. **C.** Fresh DNA preps. **D.** After 1 year of storage at -20°C.

>DS

AGCAAGGGGAGCAAACAGGATTAGATACCCTGGTAGTCCTTGCCGTAAACGATCCATACTTG  
ATGTGGATGGTCTCAAA

>MR

AGCAAGGGGAGCAAACAGGATTAGATACCCTGGTAGTCCTTGCCGTAAACGATCCATACTTG  
ATGTGGATGRTCTCAAA

>2SP

AGCAAGGGGAGCAAACAGGATTRGATACCCTGGTAGTCCTTGCCGTAAACGATCCATACTTG  
ATGTGGATGGTCTCAAA

>10SP

AGCAAGGGGAGCAAACAGGATTAGATACCCTGGTAGTCCTTGCCGTAAACGATCCATACTTG  
ATGTGGATGGTCTCAAA

>18SP

AGCAAGGGGAGCAAACAGGATTAGATACCCTGGTAGTCCTTGCCGTAAACGATCCATACTTG  
ATGTGGATGGTCTCAAA

>21SP

AGCAAGGGGAGCAAACAGGATTAGATACCCTGGTAGTCCTTGCCGTAAACGATCCATACTTG  
ATGTGGATGGTCTCAAA

>28SP

AGCAAGGGGAGCAAACAGGATTAGATACCCTGGTAGTCCTTGCCGTAAACGATCCATACTTG  
ATGTGGATGGTCTCAAA

>33SP

AGCAAGGGGAGCAAACAGGATTAGATACCCTGGTAGTCCTTGCCGTAAACGATCCATACTTG  
ATGTGGATGGTCTCAAA

>45SP

AGCAAGGGGAGCAAACAGGATTAGATACCCTGGTAGTCCTTGCCGTAAACGATCCATACTTG  
ATGTGGATGGTCTCAAA

>67SP

AGCAAGGGGAGCAAACAGGATTAGATACCCTGGTAGTCCTTGCCGTAAACGATCCATACTTG  
ATGTGGATGGTCTCAAA

>3002

AGCAAGGGGAGCAAACAGGATTAGATACCCTGGTAGTCCTTGCCGTAAACGATCCATACTTG  
ATGTGGATGGTCTCAAA

>3003

AGCAAGGGGAGCAAACAGGATTAGATACCCTGGTAGTCCTTGCCGTAAACGATCCATACTTG  
ATGTGGATGGTCTCAAA

>3014

AGCAAGGGGAGCAAACAGGATTAGATACCCTGGTAGTCCTTGCCGTAAACGATCCATACTTG  
ATGTGGATGGTCTCAAA

>3016

AGCAAGGGGAGCAAACAGGATTAGATACCCTGGTAGTCCTTGCCGTAAACGATCCATACTTG  
ATGTGGATGGTCTCAAA

>3022

AGCAAGGGGAGCAAACAGGATTAGATACCCTGGTAGTCCTTGCCGTAAACGATCCATACTTG  
ATGTGGATGGTCTCAAA

>3031

AGCAAGGGGAGCAAACAGGATTAGATACCCTGGTAGTCCTTGCCGTAAACGATCCATACTTG  
ATGTGGATGGTCTCAAA

>5005

AGCAAGGGGAGCAAACAGGATTAGATACCCTGGTAGTCCTTGCCGTAAACGATCCATACTTG  
ATGTGGATGGTCTCAAA

>5009

AGCAAGGGGAGCAAACAGGATTAGATACCCTGGTAGTCCTTGCCGTAAACGATCCATACTTG  
ATGTGGATGGTCTCAAA

>7CHP

AGCAAGGGGAGCAAACAGGATTGGATACCCTGGTAGTCCTTGCCGTAAACGATCCATACTTG  
ATGTGGATGGTCTCAAA

>13CHP

AGCAAGGGGAGCAAACAGGATTAGATACCCTGGTAGTCCTTGCCGTAAACGATCCATACTTG  
ATGTGGATGGTCTCAAA

>14CHP

AGCAAGGGGAGCAAACAGGAATAGATACCCTGGTAGTCCTTGCCGTAAACGATCCATACTTG  
ATGTGGATGGTCTCAAA

>16CHP

AGCAAGGGGAGCAAACAGGATTAGATACCCTGGTAGTCCTTGCCGTAAACGATCCATACTTG  
ATGTGGATGGTCTCAAA

>18CHP

AGCAAGGGGAGCAAACAGGATTAGATACCCTGGTAGTCCTTGCCGTAAACGATCCATACTTG  
ATGTGGATGGTCTCAAA

>28CHP

AGCAAGGGGAGCAAACAGGATTAGATACCCTGGTAGTCCTTGCCGTAAACGATCCATACTTG  
ATGTGGATGGTCTCAAA

>41CHP

AGCAAGGGGAGCAAACAGGATTAGATACCCTGGTAGTCCTTGCCGTAAACGATCCATACTTG  
ATGTGGATGGTCTCAAA

>45CHP

AGCAAGGGGAGCAAACAGGATTAGATACCCTGGTAGTCCTTGCCGTAAACGATCCATACTTG  
ATGTGGATGGTCTCAAA

>48CHP

AGCAAGGGGAGCAAACAGGATTAGATACCCTGGTAGTCCTTGCCGTAAACGATCCATACTTG  
ATGTGGATGGTCTCAAA

>49CHP

AGCAAGGGGAGCAAACAGGATTAGATACCCTGGTAGTCCTTGCCGTAAACGATCCATACTTG  
ATGTGGATGGTCTCAAA

>58CHP

AGCAAGGGGAGCAAACAGGATTAGATACCCTGGTAGTCCTTGCCGTAAACGATCCATACTTG  
ATGTGGATGGTCTCAAA

>60CHP

AGCAAGGGGAGCAAACAGGATTAGATACCCTGATAGTCCTTGCCGTAAACGATCCATACTTG  
ATGTGGATGGTCTCAAA

>71CHP

AGCAAGGGGAGCAAACAGGATTAGATACCCTGGTAGTCCTTGCCGTAAACGATCCATACTTG  
ATGTGGATGGTCTCAAA

>78CHP

AGCAAGGGGAGCAAACAGGATTAGATACCCTGGTAGTCCTTGCCGTAAACGATCCATACTTG  
ATGTGGATGGTCTCAAA

>84CHP

AGCAAGGGGAGCAAACAGGATTAGATACCCTGGTAGTCCTTGCCGTAAACGATCCATACTTG  
ATGTGGATGGTCTCAAA

>93CHP

AGCAAGGGGAGCAAACAGGATTAGATACCCTGGTAGTCCTTGCCGTAAACGATCCATACTTG  
ATGTGGATGGTCTCAAA

>97CHP

AGCAAGGGGAGCAAACAGGATTAGATACCCTGGTAGTCCTTGCCGTAAACGATCCATACTTG  
ATGTGGATGGTCTCAAA

>111CHP

AGCAAGGGGAGCAAACAGGATTAGATACCCTGGTAGTCCTTGCCGTAAACGATCCATACTTG  
ATGTGGATGGTCTCAAA

>*C. trachomatis*

AGCAAGGGGAGCAAACAGGATTAGATACCCTGGTAGTCCTTGCCGTAAACGATGCATACTTG  
ATGTGGATGGTCTCAA

>*C. pneumoniae*

AGCAAGGGGAGCAAACAGGATTAGATACCCTGGTAGTCCTTGCCGTAAACGATGCATACTTG  
ATGTGGATGGTCTCAA

>*C. psittaci*

AGCAAGGGGAGCAAACAGGATTAGATACCCTGGTAGTCCTTGCCGTAAACGATGCATACTTG  
ATGTGGATAGTCTCAA



>C. *abortus*

AGCAAGGGGAGCAAACAGGATTAGATACCCTGGTAGTCCTTGCCGTAAACGATGCATACTTG  
ATGTGGATAGTCTCAA

A.

>DS

TATGCCGCCTGAGGAGTACACTCGCAAGGGTGAAACTCAAAAGAATTGACGGGGGGCCCGCA  
CAAGCAGTGGAGCATGTGGTTTAATTCGATGCAACGCGAAGGACCTTACCTGGACTTGACAT  
GTATTTGACAACTGTAGAAATACAGCTTTCCGCAAGGACAGATACACAGGTGCTGCATGGCT  
GTCGTCAGCTCGTGCCGTGAGGTGTTGGGTAAAGTCCCGCAACGAGCGCAACCCTTATCGTTA  
GTTGCCAGCACTTAGGGTGGGAACTCTAACGAGACTGCCTGGGTAAACCAGGAGGAAGGCGA  
GGATGACGTCAAGTCAGCATGGCCCTTATGTCCAGGGCGACACACGTGCTACAATGGTTAGT  
ACAGAAGGTAGCAAGATC

>MR

TATGCCGCCTGAGGAGTACACTCGCAAGGGTGAAACTCAAAAGAATTGACGGGGGGCCCGCA  
CAAGCAGTGGAGCATGTGGTTTAATTCGATGCAACGCGAAGGACCTTACCTGGACTTGACAT  
GTATTTGACAACTGTAGAAATACAGCTTTCCGCAAGGACAGATACACAGGTGCTGCATGGCT  
GTCGTCAGCTCGTGCCGTGAGGTGTTGGGTAAAGTCCCGCAACGAGCGCAACCCTTATCGTTA  
GTTGCCAGCACTTAGGGTGGGAACTCTAACGAGACTGCCTGGGTAAACCAGGAGGAAGGCGA  
GGATGACGTCAAGTCAGCATGGCCCTTATGTCCAGGGCGACACACGTGCTACAATGGTTAGT  
ACAGAAGGTAGCAAGATC

>PS

TATGCCGCCTGAGGAGTACACTCGCAAGGGTGAAACTCAAAAGAATTGACGGGGGGCCCGCA  
CAAGCAGTGGAGCATGTGGCTTAATTCGATGCAACGCGAAGGACCTTACCTGGACTTGACAT  
GTATTTGACAACTGTAGAAATACAGCTTTCCGCAAGGACAGATACACAGGTGCTGCATGGCT  
GTCGTCAGCTCGTGCCGTGAGGTGTTGGGTAAAGTCCCGCAACGAGCGCAACCCTTATCGTTA  
GTTGCCAGCACTTAGGGTGGGAACTCTAACGAGACTGCCTGGGTAAACCAGGAGGAAGGCGA  
GGATGACGTCAAGTCAGCATGGCCCTTATGTCCAGGGCGACACACGTGCTACAATGGTTAAT  
ACAGAAGGTAGCAAGATC

>5SP

TATGCCGCCTGAGGAGTACACTCGCAAGGGTGAAACTCAAAAGAATTGACGGGGGGCCCGCA  
CAAGCAGTGGAGCATGTGGTTTAATTCGATGCAACGCGAAGGACCTTACCTGGACTTGACAT  
GTATTTGACAACTGTAGAAATACAGCTTTCCGCAAGGACAGATACACAGGTGCTGCATGGCT  
GTCGTCAGCTCGTGCCGTGAGGTGTTGGGTAAAGTCCCGCAACGAGCGCAACCCTTATCGTTA  
GTTGCCAGCACTTAGGGTGGGAACTCTAACGAGACTGCCTGGGTAAACCAGGAGGAAGGCGA  
GGATGACGTCAAGTCAGCATGGCCCTTATGTCCAGGGCGACACACGTGCTACAATGGTTAGT  
ACAGAAGGTAGCAAGATC

>10SP

TATGCCGCCTGAGGAGTACACTCGCAAGGGTGAAACTCAAAAGAATTGACGGGGGGCCCGCA  
CAAGCAGTGGAGCATGTGGTTTAATTCGATGCAACGCGAAGGACCTTACCTGGACTTGACAT  
GTATTTGACAACTGTAGAAATACAGCTTTCCGCAAGGACAGATACACAGGTGCTGCATGGCT  
GTCGTCAGCTCGTGCCGTGAGGTGTTGGGTAAAGTCCCGCAACGAGCGCAACCCTTATCGTTA  
GTTGCCAGCACTTAGGGTGGGAACTCTAACGAGACTGCCTGGGTAAACCAGGAGGAAGGCGA  
GGATGACGTCAAGTCAGCATGGCCCTTATGTCCAGGGCGACACACGTGCTACAATGGTTAGT  
ACAGAAGGTAGCAAGATC

>18SP

CATGCCGCCTGAGGAGTACACTCGCAAGGGTGAAACTCAAAAGAATTGACGGGGGGCCCGCA  
CAAGCAGTGGAGCATGTGGTTTAATTTCGATGCAACGCGAAGGACCTTACCTGGACTTGACAT  
GTATTTGACAACTGTAGAAATACAGCTTTCCGCAAGGACAGATACACAGGTGCTGCATGGCT  
GTCGTCAGCTCGTGCCGTGAGGTGTTGGGTAAAGTCCCGCAACGAGCGCAACCCTTATCGTTA  
GTTGCCAGCACTTAGGGTGGGAACTCTAACGAGACTGCCTGGGTAAACCAGGAGGAAGGCGA  
GGATGACGTCAAGTCAGCATGGCCCTTATGTCCAGGGCGACACACGTGCTACAATGGTTAGT  
ACAGAAGGTAGCAAGATC

>20SP

TATGCCGCCTGAGGAGTACACTCGCAAGGGTGAAACTCAAAAGAATTGACGGGGGGCCCGCA  
CAAGCAGTGGAGCATGTGGTTTAATTTCGATGCAACGCGAAGGACCTTACCTGGACTTGACAT  
GTATTTGACAACTGYAGAAATACAGCTTTCCGCAAGGACAGATACACAGGTGCTGCATGGCT  
GTCGTCAGCTCGTGCCGTGAGGTGTTGGGTAAAGTCCCGCAACGAGCGCAACCCTTATCGTTA  
GTTGCCAGCACTTAGGGTGGGAACTCTAACGAGACTGCCTGGGTAAACCAGGAGGAAGGCGA  
GGATGACGTCAAGTCAGCATGGCCCTTATGTCCAGGGCGACACACGTGCTACAATGGTTAGA  
TCAGAAGGTAGCAAGATC

>21SP

TATGCCGCCTGAGGAGTACACTCGCAAGGGTGAAACTCAAAAGAATTGACGGGGGGCCCGCA  
CAAGCAGTGGAGCATGTGGTTTAATTTCGATGCAACGCGAAGGACCTTACCTGGACTTGACAT  
GTATTTGACAACTGTAGAAATACAGCTTTCCGCAAGGACAGATACACAGGTGCTGCATGGCT  
GTCGTCAGCTCGYGCCGTGAGGTGTTGGGTAAAGTCCCGCAACGAGCGCAACCCTTATCGTTA  
GTTGCCAGCACTTAGGGTGGGAACTCTAACGAGACTGCCTGGGTAAACCAGGGGAAGGCGAG  
GATGACGTCAAGTCAGCATGGCCCTTATGTCCAGGGCGACACACGTGCTACAATGGTTAGTAC  
AGAAGGTAGCAAGATC

>33SP

TATGCCGCCTGAGGAGTACACTCGCAAGGGTGAAACTCAAAAGAATTGACGGGGGGCCCGCA  
CAAGCAGTGGAGCATGTGGTTTAATTTCGATGCAACGCGAAGGACCTTACCTGGACTTGACAT  
GTATTTGACAACTGTAGAAATACAGCTTTCCGCAAGGACAGATACACAGGTGCTGCATGGCT  
GTCGTCAGCTCGTGCCGTGAGGTGTTGGGTAAAGTCCCGCAACGAGCGCAACCCTTATCGTTA  
GTTGCCARCACTTAGGGTGGGAACTCTAACGAGACTGCCTGGGTAAACCAGGAGGAAGGCGA  
GGATGACGTCAAGTCAGCATGGCCCTTATGTCCAGGGCGACACACGTGCTACAATGGTTAGT  
ACAGAAGGTAGCAAGATC

>45SP

TATGCCGCCTGAGGAGTACACTCGCAAGGGTGAAACTCAAAAGAATTGACGGGGGGCCCGCA  
CAAGCAGTGGAGCATGTGGTTTAATTTCGATGCAACGCGAAGGACCTTACCTGGACTTGACAT  
GTATTTGACAACTGTAGAAATACAGCTTTCCGCAAGGACAGATACACAGGTGCTGCATGGCT  
GTCGTCAGCTCGTGCCGTGAGGTGTTGGGTAAAGTCCCGCAACGAGCGCAACCCTTATCGTTA  
GTTGCCAGCACTTAGGGTGGGAACTCTAACGAGACTGCCTGGGTAAACCAGGAGGAAGGCGA  
GGATGACGTCAAGTCAGCATGGCCCTTATGTCCAGGGCGACACACGTGCTACAATGGTTAGT  
ACAGAAGGTAGCAAGATC

>3014

TACTCAAGAATTGGACGGGCGTGTTCCGCACAAGCAGTGGAGCATGTGGTTTAATTTCGATGCA  
ACGCGAAGAACCCTTACCCAGGCTCGAAATGCAAAGGCAATCAACAGAGATGTTGAGTTCCGC  
AAGGACTTTTGTATAGGTGCTGCATGGCTGTCGTCAGCTCGTGCCGTGAGGTGTTGGGTAAAGT  
CCCGCAACGAGCGCAACCCTTATCGTTAGTTGCCAACATTTTAGGTGGGAACTCTAACGAGAC  
TGCTGGGTAAACCAGGAGGAAGGTGAGGATGACGTCAAGTCCGCATGGCCCTTATGTCTGG

GGCTACACACGTGCTACAATGGTCGGTACAGAAGGCAGCAAGATCGTGAGATGGAGCAAAT  
CA

>3016

TATGCCGCCTGAGGAGTACACTCGCAAGGGTGAAACTCAAAAGAATTGACGGGGGGCCCGCA  
CAAGCAGTGGAGCATGTGGTTTAATTCGATGCAACGCGAAGGACCTTACCTGGACTTGACAT  
GTATTTGACAACTGTAGAAATACAGCTTTCCGCAAGGACAGATACACAGGTGCTGCATGGCT  
GTCGTCAGCTCGTGCCGTGAGGTGTTGGGTAAAGTCCCGCAACGAGCGCAACCCTTATCGTTA  
GTTGCCAGCACTTAGGGTGGGAACCTCTAACGAGACTGCCTGGGTAAACCAGGAGGAAGGCGA  
GGATGACGTCAAGTCAGCATGGCCCTTATGTCCAGGGCGACACACGTGCTACAATGGTTAGT  
ACAGAAGGTAGCAAGATC

>57CHP

TGGGGAGTACGCTCGCAAGGGTGAAACTCAAAAGAATTGACGGGGGGCCCGCACAAAGCAGTG  
GAGCATGTGGTTTAATTCGATGCAACGCGAAGAACCTTACCCAGGCTCGAAATGCAAAGGCA  
ATCAACAGAGATGTTGAGTTCCGAAAGGACTTTTGTATAGGTGCTGCATGGCTGTCGTCAGCT  
CGTGCCGTGAGGTGTTGGGTAAAGTCCCGCAACGAGCGCAACCCTTATCGTTAGTTGCCAACA  
CGCAAGGTGGGGACTCTAACGAGACTGCCTAGGTAAACCTAGGAGGAAGGTGAGGATGACGT  
CAAGTCCGCATGGCCTTTATGTCTGGGGCTACACA

**B.**

**Figure S4 A.** Sequences of 79 nt SNPCR products, **B.** sequences of 346 nt of SNPCR product amplified from sputa.

CLUSTAL X (1.81) multiple sequence alignment

```

14. CHP      AGCAAGGGGAGCAAAACAGGAATTAGATACCCTGGTAGTCCTTGCCGTAAACGATCCATACT
60. CHP      AGCAAGGGGAGCAAAACAGGATTAGATACCCTGGTAGTCCTTGCCGTAAACGATCCATACT
2. SP        AGCAAGGGGAGCAAAACAGGATTGATACCCTGGTAGTCCTTGCCGTAAACGATCCATACT
7. CHP       AGCAAGGGGAGCAAAACAGGATTGGATACCCTGGTAGTCCTTGCCGTAAACGATCCATACT
MR           AGCAAGGGGAGCAAAACAGGATTAGATACCCTGGTAGTCCTTGCCGTAAACGATCCATACT
111. CHP     AGCAAGGGGAGCAAAACAGGATTAGATACCCTGGTAGTCCTTGCCGTAAACGATCCATACT
97. CHP      AGCAAGGGGAGCAAAACAGGATTAGATACCCTGGTAGTCCTTGCCGTAAACGATCCATACT
93. CHP      AGCAAGGGGAGCAAAACAGGATTAGATACCCTGGTAGTCCTTGCCGTAAACGATCCATACT
84. CHP      AGCAAGGGGAGCAAAACAGGATTAGATACCCTGGTAGTCCTTGCCGTAAACGATCCATACT
78. CHP      AGCAAGGGGAGCAAAACAGGATTAGATACCCTGGTAGTCCTTGCCGTAAACGATCCATACT
71. CHP      AGCAAGGGGAGCAAAACAGGATTAGATACCCTGGTAGTCCTTGCCGTAAACGATCCATACT
58. CHP      AGCAAGGGGAGCAAAACAGGATTAGATACCCTGGTAGTCCTTGCCGTAAACGATCCATACT
49. CHP      AGCAAGGGGAGCAAAACAGGATTAGATACCCTGGTAGTCCTTGCCGTAAACGATCCATACT
48. CHP      AGCAAGGGGAGCAAAACAGGATTAGATACCCTGGTAGTCCTTGCCGTAAACGATCCATACT
45. CHP      AGCAAGGGGAGCAAAACAGGATTAGATACCCTGGTAGTCCTTGCCGTAAACGATCCATACT
41. CHP      AGCAAGGGGAGCAAAACAGGATTAGATACCCTGGTAGTCCTTGCCGTAAACGATCCATACT
28. CHP      AGCAAGGGGAGCAAAACAGGATTAGATACCCTGGTAGTCCTTGCCGTAAACGATCCATACT
18. CHP      AGCAAGGGGAGCAAAACAGGATTAGATACCCTGGTAGTCCTTGCCGTAAACGATCCATACT
16. CHP      AGCAAGGGGAGCAAAACAGGATTAGATACCCTGGTAGTCCTTGCCGTAAACGATCCATACT
13. CHP      AGCAAGGGGAGCAAAACAGGATTAGATACCCTGGTAGTCCTTGCCGTAAACGATCCATACT
5009. SP     AGCAAGGGGAGCAAAACAGGATTAGATACCCTGGTAGTCCTTGCCGTAAACGATCCATACT
5005. SP     AGCAAGGGGAGCAAAACAGGATTAGATACCCTGGTAGTCCTTGCCGTAAACGATCCATACT
3031. SP     AGCAAGGGGAGCAAAACAGGATTAGATACCCTGGTAGTCCTTGCCGTAAACGATCCATACT
3022. SP     AGCAAGGGGAGCAAAACAGGATTAGATACCCTGGTAGTCCTTGCCGTAAACGATCCATACT
3016. SP     AGCAAGGGGAGCAAAACAGGATTAGATACCCTGGTAGTCCTTGCCGTAAACGATCCATACT
3014. SP     AGCAAGGGGAGCAAAACAGGATTAGATACCCTGGTAGTCCTTGCCGTAAACGATCCATACT
3003. SP     AGCAAGGGGAGCAAAACAGGATTAGATACCCTGGTAGTCCTTGCCGTAAACGATCCATACT
3002. SP     AGCAAGGGGAGCAAAACAGGATTAGATACCCTGGTAGTCCTTGCCGTAAACGATCCATACT
67. SP       AGCAAGGGGAGCAAAACAGGATTAGATACCCTGGTAGTCCTTGCCGTAAACGATCCATACT
45. SP       AGCAAGGGGAGCAAAACAGGATTAGATACCCTGGTAGTCCTTGCCGTAAACGATCCATACT
33. SP       AGCAAGGGGAGCAAAACAGGATTAGATACCCTGGTAGTCCTTGCCGTAAACGATCCATACT
28. SP       AGCAAGGGGAGCAAAACAGGATTAGATACCCTGGTAGTCCTTGCCGTAAACGATCCATACT
21. SP       AGCAAGGGGAGCAAAACAGGATTAGATACCCTGGTAGTCCTTGCCGTAAACGATCCATACT
18. SP       AGCAAGGGGAGCAAAACAGGATTAGATACCCTGGTAGTCCTTGCCGTAAACGATCCATACT
10. SP       AGCAAGGGGAGCAAAACAGGATTAGATACCCTGGTAGTCCTTGCCGTAAACGATCCATACT
DS           AGCAAGGGGAGCAAAACAGGATTAGATACCCTGGTAGTCCTTGCCGTAAACGATCCATACT
C. trachomatis AGCAAGGGGAGCAAAACAGGATTAGATACCCTGGTAGTCCTTGCCGTAAACGATGCATACT
C. pneumoniae  AGCAAGGGGAGCAAAACAGGATTAGATACCCTGGTAGTCCTTGCCGTAAACGATGCATACT
C. psittaci    AGCAAGGGGAGCAAAACAGGATTAGATACCCTGGTAGTCCTTGCCGTAAACGATGCATACT
C. abortus     AGCAAGGGGAGCAAAACAGGATTAGATACCCTGGTAGTCCTTGCCGTAAACGATGCATACT
*****

```

```

14. CHP      TGATGTGGATGGTCTCAAA
60. CHP      TGATGTGGATGGTCTCAAA
2. SP        TGATGTGGATGGTCTCAAA
7. CHP       TGATGTGGATGGTCTCAAA
MR           TGATGTGGATGRTCTCAAA
111. CHP     TGATGTGGATGGTCTCAAA
97. CHP      TGATGTGGATGGTCTCAAA
93. CHP      TGATGTGGATGGTCTCAAA
84. CHP      TGATGTGGATGGTCTCAAA
78. CHP      TGATGTGGATGGTCTCAAA
71. CHP      TGATGTGGATGGTCTCAAA
58. CHP      TGATGTGGATGGTCTCAAA
49. CHP      TGATGTGGATGGTCTCAAA
48. CHP      TGATGTGGATGGTCTCAAA
45. CHP      TGATGTGGATGGTCTCAAA
41. CHP      TGATGTGGATGGTCTCAAA
28. CHP      TGATGTGGATGGTCTCAAA
18. CHP      TGATGTGGATGGTCTCAAA
16. CHP      TGATGTGGATGGTCTCAAA
13. CHP      TGATGTGGATGGTCTCAAA
5009. SP     TGATGTGGATGGTCTCAAA
5005. SP     TGATGTGGATGGTCTCAAA
3031. SP     TGATGTGGATGGTCTCAAA
3022. SP     TGATGTGGATGGTCTCAAA
3016. SP     TGATGTGGATGGTCTCAAA
3014. SP     TGATGTGGATGGTCTCAAA
3003. SP     TGATGTGGATGGTCTCAAA
3002. SP     TGATGTGGATGGTCTCAAA
67. SP       TGATGTGGATGGTCTCAAA
45. SP       TGATGTGGATGGTCTCAAA
33. SP       TGATGTGGATGGTCTCAAA
28. SP       TGATGTGGATGGTCTCAAA
21. SP       TGATGTGGATGGTCTCAAA
18. SP       TGATGTGGATGGTCTCAAA
10. SP       TGATGTGGATGGTCTCAAA
DS           TGATGTGGATGGTCTCAAA
C. trachomatis  TGATGTGGATGGTCTCAAA
C. pneumoniae  TGATGTGGATGGTCTCAAA
C. psittaci     TGATGTGGATAGTCTCAAA
C. abortus     TGATGTGGATAGTCTCAAA
*****

```

**Figure S5** Alignment of SNPCR sequences. Polymorphic sites are grey shadowed.

**TABLE S1** Sputum sample data.

| Number | Sample | Age | Gender | NPCR<br>461 bp | NPCR<br>121 bp | mtDNA<br>1023 bp | mtDNA<br>250 bp |
|--------|--------|-----|--------|----------------|----------------|------------------|-----------------|
| 1      | DS*    | 27  | F      | +              | +              | +                | nd              |
| 2      | MŠ     | 24  | F      | -              | -              | +                | nd              |
| 3      | BŠ     | 24  | F      | -              | -              | +                | nd              |
| 4      | MS     | 27  | M      | -              | -              | +                | nd              |
| 5      | PS*    | 60  | M      | +              | +              | +                | nd              |
| 6      | MR     | 24  | M      | +              | +              | +                | nd              |
| 7      | 2SP    | 24  | F      | -              | +              | +                | nd              |
| 8      | 3SP    | 25  | F      | -              | -              | +                | nd              |
| 9      | 4SP    | 27  | F      | -              | -              | +                | nd              |
| 10     | 5SP    | 28  | M      | +              | +              | +                | nd              |
| 11     | 6SP    | 55  | F      | -              | -              | +                | nd              |
| 12     | 7SP    | 58  | F      | -              | -              | +                | nd              |
| 13     | 10SP   | 27  | F      | +              | +              | -                | +               |
| 14     | 11SP   | 60  | F      | -              | -              | +                | nd              |
| 15     | 17SP   | 28  | F      | -              | -              | +                | nd              |
| 16     | 18SP   | 30  | M      | +              | +              | +                | nd              |

|    |       |    |   |   |   |   |    |
|----|-------|----|---|---|---|---|----|
| 17 | 20SP  | 26 | F | + | + | + | nd |
| 18 | 21SP  | 27 | F | + | + | + | nd |
| 19 | 27SP  | 22 | F | - | - | + | nd |
| 20 | 28SP  | 55 | M | - | + | + | nd |
| 21 | 29SP  | 35 | M | - | - | + | nd |
| 22 | 30SP  | 53 | M | - | - | + | nd |
| 23 | 33SP  | 23 | F | + | + | + | nd |
| 24 | 34SP  | 27 | M | - | - | + | nd |
| 25 | 37SP  | 49 | F | - | - | + | nd |
| 26 | 38SP  | 49 | M | - | - | + | nd |
| 27 | 39SP  | 22 | F | - | - | + | nd |
| 28 | 41SP  | 65 | M | - | - | + | nd |
| 29 | 44SP  | 65 | M | - | - | + | nd |
| 30 | 45SP* | 31 | M | + | + | + | nd |
| 31 | 48SP  | 53 | F | - | - | + | nd |
| 32 | 49SP  | 72 | M | - | - | + | nd |
| 33 | 52SP  | 29 | F | - | - | + | nd |
| 34 | 54SP  | 22 | F | - | - | + | nd |
| 35 | 58SP  | 26 | M | - | - | + | nd |
| 36 | 60SP  | 22 | M | - | - | + | nd |
| 37 | 61SP  | 26 | F | - | - | + | nd |
| 38 | 64SP  | 23 | F | - | - | + | nd |
| 39 | 66SP  | 20 | F | - | - | + | nd |
| 40 | 67SP  | 20 | F | - | + | + | nd |
| 41 | 68SP  | 26 | F | - | - | + | nd |
| 42 | 69SP  | 40 | F | - | - | + | nd |
| 43 | 70SP  | 31 | M | - | - | + | nd |
| 44 | 1002  | 41 | M | - | - | + | nd |
| 45 | 3001  | 25 | M | - | - | + | nd |
| 46 | 3002  | 25 | M | - | + | + | nd |
| 47 | 3003  | 25 | M | - | + | + | nd |
| 48 | 3004  | 24 | M | - | - | + | nd |
| 49 | 3005  | 25 | M | - | - | + | nd |
| 50 | 3006  | 22 | M | - | - | + | nd |
| 51 | 3007  | 28 | F | - | - | + | nd |
| 52 | 3008  | 30 | M | - | - | + | nd |
| 53 | 3009  | 20 | M | - | - | + | nd |
| 54 | 3010  | 22 | M | - | - | + | nd |
| 55 | 3011  | 26 | M | - | - | + | nd |
| 56 | 3012  | 21 | M | - | - | + | nd |
| 57 | 3013  | 28 | M | - | - | + | nd |
| 58 | 3014  | 22 | M | + | + | + | nd |
| 59 | 3015  | 27 | M | - | - | + | nd |
| 60 | 3016  | 27 | M | + | + | + | nd |
| 61 | 3017  | 30 | M | - | - | + | nd |
| 62 | 3018  | 21 | M | - | - | + | nd |
| 63 | 3019  | 30 | M | - | - | + | nd |
| 64 | 3020  | 30 | M | - | - | + | nd |
| 65 | 3021  | 19 | M | - | - | + | nd |

|     |       |    |   |   |   |   |    |
|-----|-------|----|---|---|---|---|----|
| 66  | 3022  | 21 | M | - | + | + | nd |
| 67  | 3023  | 24 | M | - | - | + | nd |
| 68  | 3024  | 24 | M | - | - | + | nd |
| 69  | 3025  | 24 | M | - | - | - | +  |
| 70  | 3026  | 22 | M | - | - | + | nd |
| 71  | 3027  | 21 | M | - | - | - | +  |
| 72  | 3028  | 26 | M | - | - | + | nd |
| 73  | 3029  | 24 | M | - | - | + | nd |
| 74  | 3030  | 23 | F | - | - | + | nd |
| 75  | 3031  | 26 | M | - | + | + | nd |
| 76  | 3032  | 21 | M | - | - | + | nd |
| 77  | 3033  | 30 | M | - | - | + | nd |
| 78  | 5002  | 63 | F | - | - | + | nd |
| 79  | 5003  | 57 | F | - | - | + | nd |
| 80  | 5004  | 51 | M | - | - | + | nd |
| 81  | 5005  | 77 | M | - | + | + | nd |
| 82  | 5006  | 74 | F | - | - | + | nd |
| 83  | 5007  | 66 | M | - | - | + | nd |
| 84  | 5008  | 51 | F | - | - | + | nd |
| 85  | 5009  | 66 | F | - | + | + | nd |
| 86  | 2CHP  | 24 | M | - | - | - | +  |
| 87  | 3CHP  | 60 | F | - | - | + | nd |
| 88  | 4CHP  | 41 | F | - | - | - | +  |
| 89  | 5CHP  | 59 | M | - | - | - | +  |
| 90  | 7CHP  | 77 | M | - | + | + | nd |
| 91  | 9CHP  | 63 | F | - | - | + | nd |
| 92  | 11CHP | 29 | M | - | - | + | nd |
| 93  | 13CHP | 44 | F | - | + | - | +  |
| 94  | 14CHP | 47 | M | - | + | + | nd |
| 95  | 15CHP | 47 | M | - | - | - | +  |
| 96  | 16CHP | 26 | F | - | + | + | nd |
| 97  | 18CHP | 28 | M | - | + | + | nd |
| 98  | 19CHP | 25 | M | - | - | + | nd |
| 99  | 20CHP | 53 | F | - | - | + | nd |
| 100 | 21CHP | 42 | F | - | - | - | +  |
| 101 | 23CHP | 27 | M | - | - | + | nd |
| 102 | 24CHP | 33 | F | - | - | + | nd |
| 103 | 27CHP | 48 | M | - | - | + | nd |
| 104 | 29CHP | 44 | F | - | - | + | nd |
| 105 | 30CHP | 55 | F | - | - | + | nd |
| 106 | 31CHP | 66 | M | - | - | + | nd |
| 107 | 33CHP | 69 | M | - | - | + | nd |
| 108 | 36CHP | 62 | F | - | - | + | nd |
| 109 | 37CHP | 67 | M | - | - | - | +  |
| 110 | 38CHP | 43 | M | - | - | + | nd |
| 111 | 39CHP | 39 | F | - | - | + | nd |
| 112 | 41CHP | 61 | F | - | + | + | nd |
| 113 | 45CHP | 16 | F | - | + | + | nd |
| 114 | 48CHP | 37 | M | - | + | + | nd |

|     |        |    |   |   |   |   |    |
|-----|--------|----|---|---|---|---|----|
| 115 | 49CHP  | 37 | F | - | + | + | nd |
| 116 | 52CHP  | 30 | M | - | - | - | +  |
| 117 | 53CHP  | 55 | F | - | - | + | nd |
| 118 | 57CHP  | 43 | F | + | + | + | nd |
| 119 | 58CHP  | 67 | F | - | + | + | nd |
| 120 | 60CHP  | 22 | M | - | + | - | +  |
| 121 | 62CHP  | 60 | M | - | - | + | nd |
| 122 | 63CHP  | 27 | F | - | - | + | nd |
| 123 | 64CHP  | 24 | F | - | - | + | nd |
| 124 | 71CHP  | 28 | M | - | + | + | nd |
| 125 | 73CHP  | 33 | M | - | - | - | +  |
| 126 | 74CHP  | 56 | F | - | - | + | nd |
| 127 | 76CHP  | 29 | M | - | - | + | nd |
| 128 | 77CHP  | 33 | M | - | - | - | +  |
| 129 | 78CHP  | 60 | F | - | + | + | nd |
| 130 | 80CHP  | 34 | M | - | - | - | +  |
| 131 | 81CHP  | 38 | F | - | - | + | nd |
| 132 | 84CHP  | 60 | F | - | + | + | nd |
| 133 | 85CHP  | 61 | M | - | - | + | nd |
| 134 | 88CHP  | 49 | M | - | - | + | nd |
| 135 | 91CHP  | 37 | F | - | - | + | nd |
| 136 | 92CHP  | 43 | M | - | - | - | +  |
| 137 | 93CHP  | 70 | F | - | + | + | nd |
| 138 | 96CHP  | 45 | F | - | - | + | nd |
| 139 | 97CHP  | 27 | F | - | + | - | +  |
| 140 | 98CHP  | 44 | F | - | - | - | +  |
| 141 | 101CHP | 25 | F | - | - | + | nd |
| 142 | 102CHP | 26 | M | - | - | - | +  |
| 143 | 105CHP | 34 | F | - | - | + | nd |
| 144 | 107CHP | 23 | F | - | - | - | +  |
| 145 | 108CHP | 25 | F | - | - | + | nd |
| 146 | 109CHP | 52 | F | - | - | + | nd |
| 147 | 110CHP | 58 | M | - | - | + | nd |
| 148 | 111CHP | -  | M | - | + | + | nd |
| 149 | 1080*  | 24 | M | + | - | + | nd |
| 150 | 1082*  | 47 | F | - | + | + | nd |
| 151 | 1089*  | 65 | F | - | + | + | nd |
| 152 | 1096*  | 41 | F | - | + | + | nd |
| 153 | 1779*  | 33 | F | - | + | + | nd |
| 154 | 1788*  | 38 | F | - | + | + | nd |
| 155 | 1803*  | 52 | M | - | + | + | nd |
| 156 | 1828*  | 49 | F | - | + | + | nd |
| 157 | 1838*  | 42 | M | - | + | + | nd |

\* positive or threshold IgG or IgA; nd – non determined
